# Supplementary material for: How tailor-made copolymers can control the structure and properties of hybrid nanomaterials: the case of polyionic complexes
Source: Royal Society of Chemistry journal article supplement (doi:10.1039/d4nr04332d), 2025-01-01
Supplement: d4nr04332d1.pdf [file d4nr04332d1.pdf]

## Supporting Information

for

### **How tailor-made copolymers can control the structure and properties of hybrid nanomaterials: the case of polyionic complexes**

Liming Peng<sup>a,b</sup>, Maksym Odnoroh<sup>a</sup>, Mathias Destarac<sup>a</sup>, Yannick Coppel<sup>c</sup>, Céline Delmas<sup>d</sup>, Florence Benoit-Marquié<sup>a</sup>, Christophe Mingotaud<sup>a</sup>, Jean-Daniel Marty<sup>a,\*</sup>

<sup>a</sup> Laboratoire Softmat, Université de Toulouse, CNRS UMR 5623, 118 route de Narbonne, F-31062 Toulouse, France

<sup>b</sup> Current address: School of Chemistry, Chemical Engineering, and Materials, Jining University, Qufu, Shandong 273155, China

<sup>c</sup> Laboratoire de Chimie de Coordination, Université de Toulouse, CNRS UPR 8241, 205 route de Narbonne, 31062 Toulouse, France

<sup>d</sup> MIAT UR 875, INRAE, Université de Toulouse, F-31326 Castanet-Tolosan, France

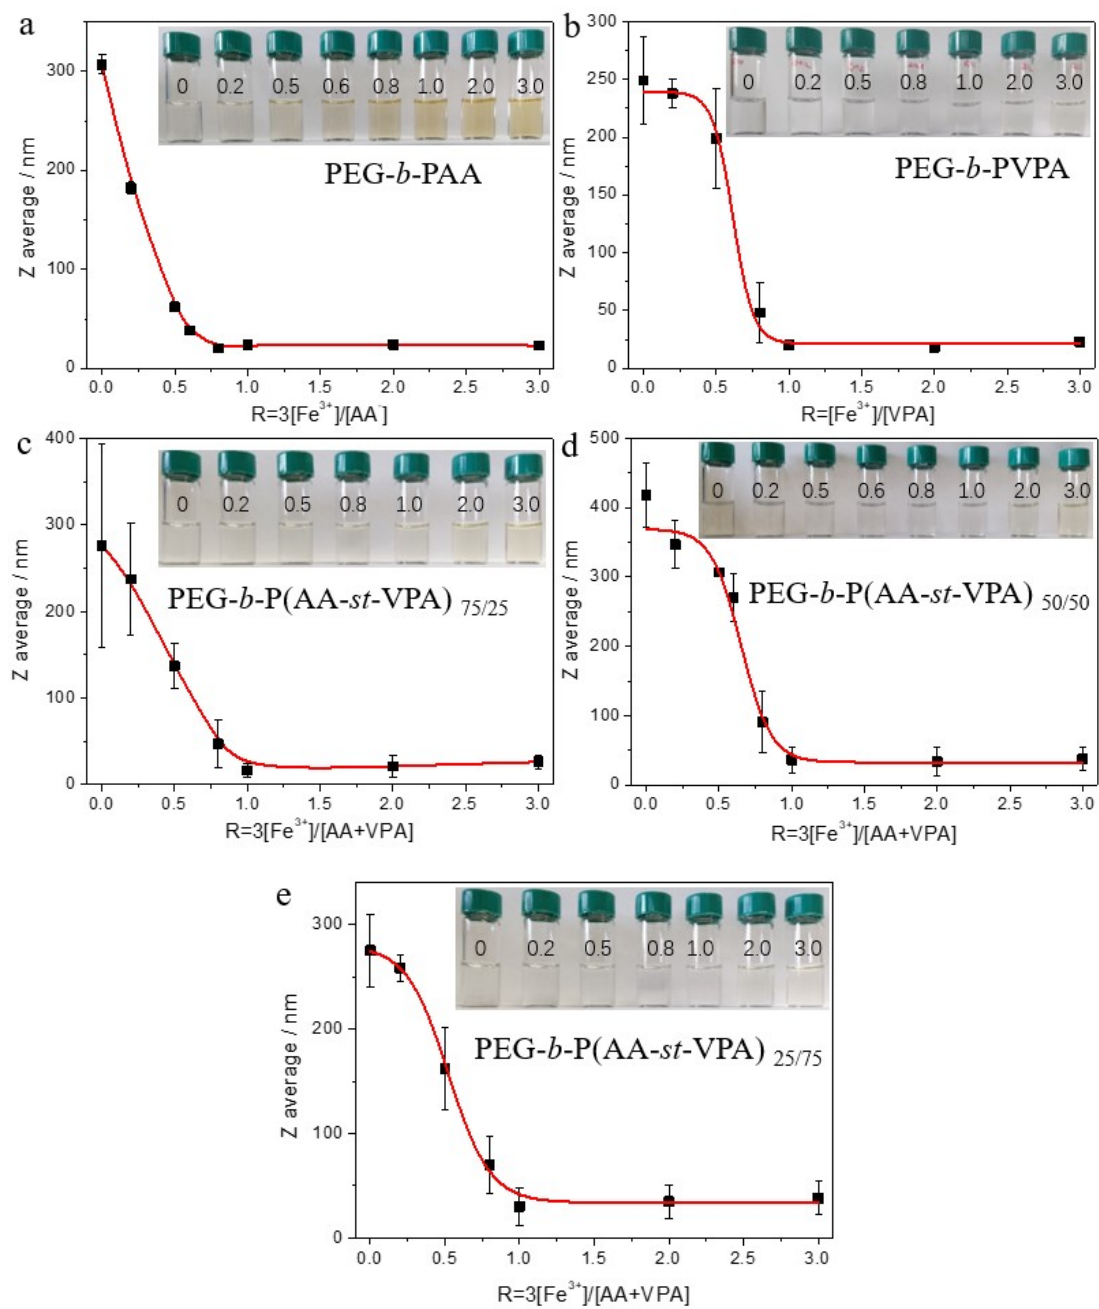

**Figure S1.** Evolution of the Z-average diameter obtained from DLS measurements of STHPICs solutions as a function of R-ratio for Fe<sup>3+</sup>. The HPICs are based on a) PEG-*b*-PAA, b) PEG-*b*-PVPA, c) PEG-*b*-P(AA-*st*-VPA)<sub>75/25</sub>, d) PEG-*b*-P(AA-*st*-VPA)<sub>50/50</sub> and e) PEG-*b*-P(AA-*st*-VPA)<sub>25/75</sub> (with the corresponding pictures).

**Table S1.** Hydrodynamic size of the **ST-HPICs** synthesized from block copolymers with different PAA/PVPA contents.

| ST-HPICs samples                             | DLS sizes (nm) |
|----------------------------------------------|----------------|
| HPICs-PAA                                    | $24 \pm 0.7$   |
| HPICs-P(AA- <i>st</i> -VPA) <sub>75/25</sub> | $16 \pm 8.0$   |
| HPICs-P(AA- <i>st</i> -VPA) <sub>50/50</sub> | $36 \pm 18$    |
| HPICs-P(AA- <i>st</i> -VPA) <sub>25/75</sub> | $30 \pm 18$    |
| HPICs-PVPA                                   | $20 \pm 3.6$   |

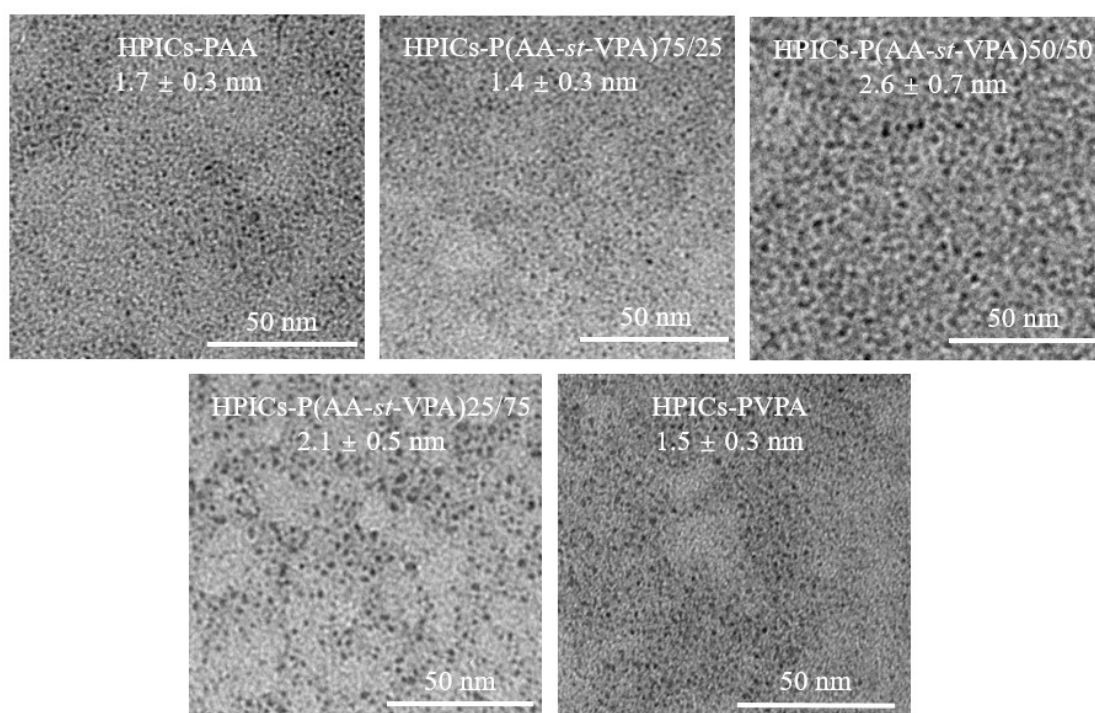

**Figure S2.** TEM of dried **ST-HPICs** solutions formed by PEG-*b*-P(AA<sub>x</sub>-*st*-VPA<sub>1-x</sub>) statistical block copolymers.

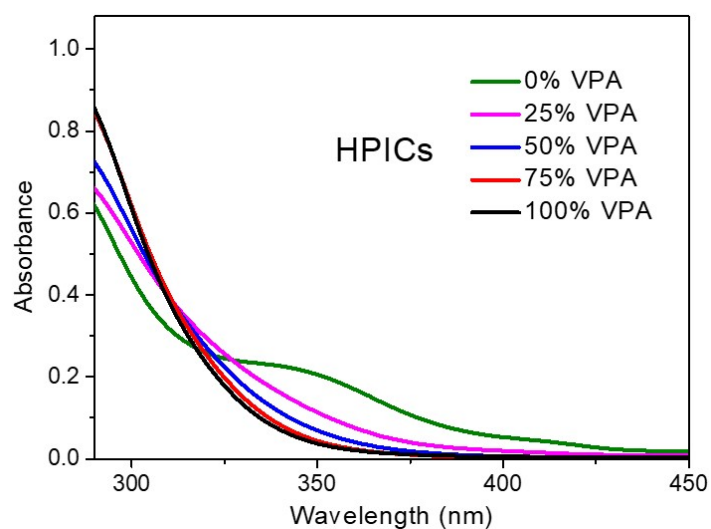

**Figure S3.** UV-Vis spectra of ST-HPICs structures formed by PEG-*b*-P(AA<sub>x</sub>-*st*-VPA<sub>1-x</sub>) statistical block copolymers (pH=3).

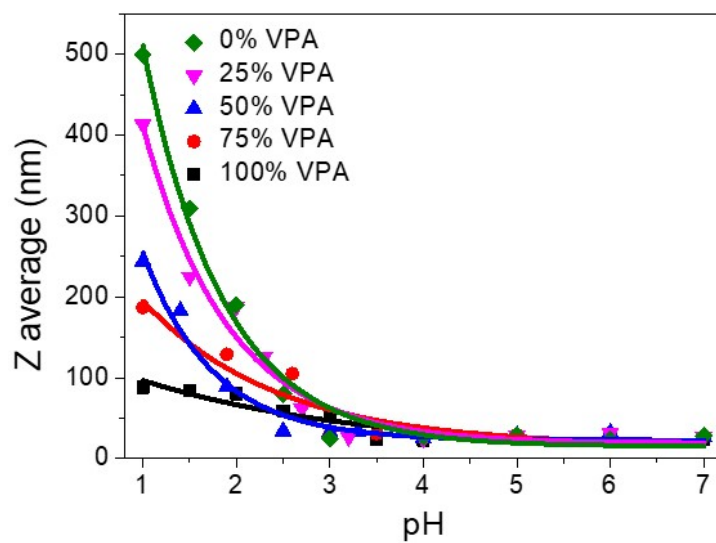

**Figure S4.** pH stability of ST HPICs structures formed by PEG-*b*-P(AA<sub>x</sub>-*st*-VPA<sub>1-x</sub>) statistical block copolymers.

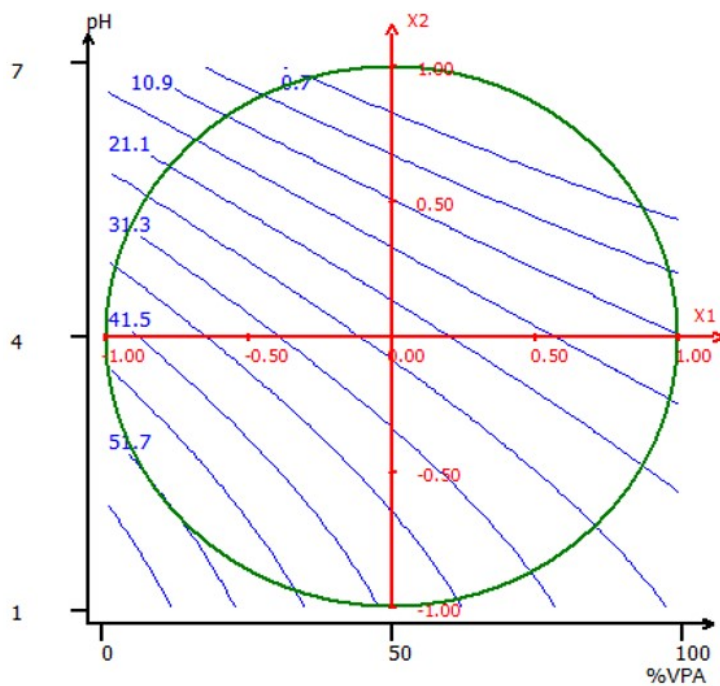

**Figure S5.** Response surface methodology on the influence of **ST-HPICs** on VPA content and pH. Reaction conditions: **ST-HPICs** HPICs-Fe-R=1.0,  $[\text{Fe}^{3+}] = 1.3 \times 10^{-5} \text{ M}$ ,  $[\text{AB1}] = 2.2 \times 10^{-5} \text{ M}$ ,  $[\text{H}_2\text{O}_2] = 1.5 \times 10^{-3} \text{ M}$ , reaction time : 2h.  $x_1$  and  $x_2$  represent VPA content and pH respectively.

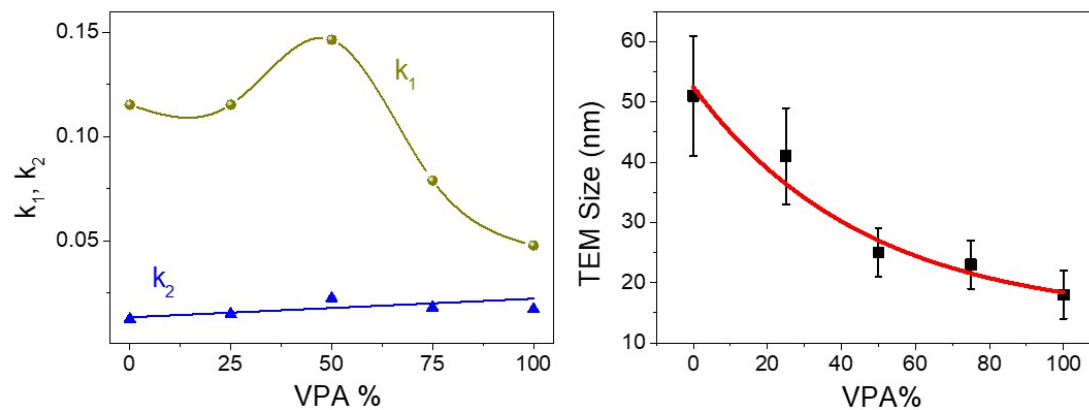

**Figure S6.** The relationship between VPA content and TEM size of different Prussian blue nanoparticles synthesized with **ST-HPICs** pre-organized system.

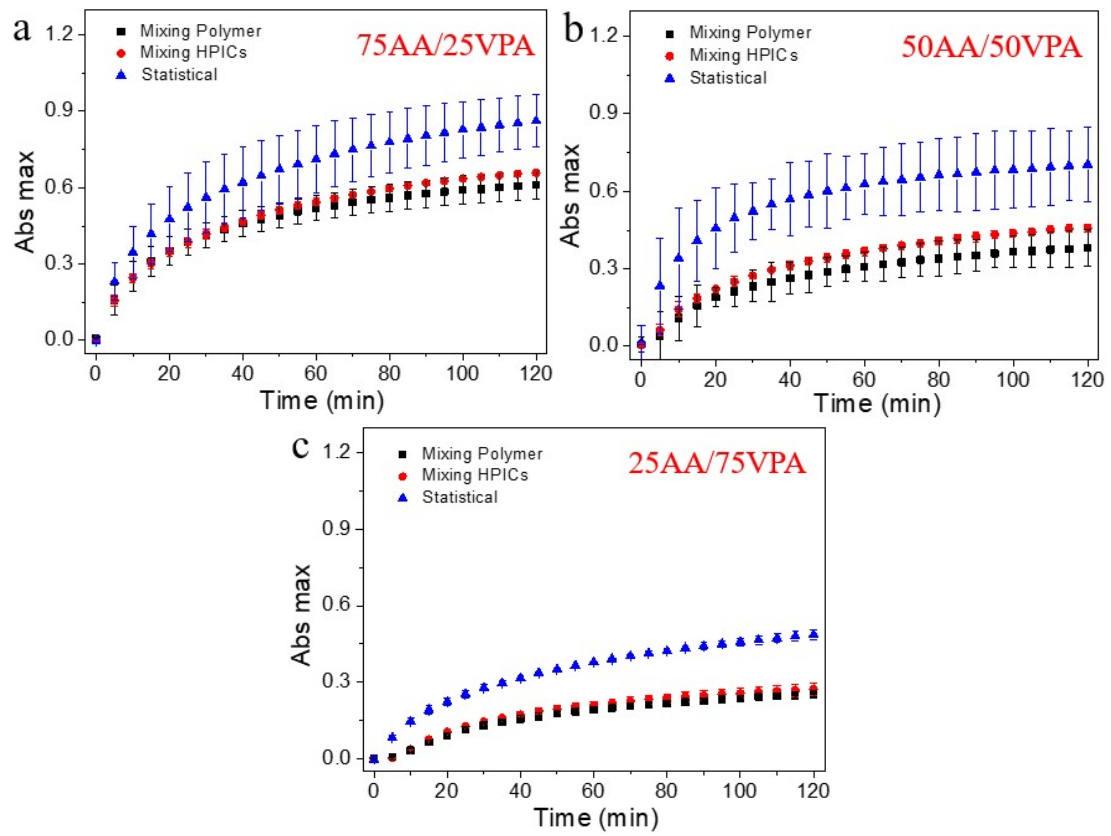

**Figure S7.** Comparison of the maximum absorbance of Prussian blue nanoparticles generated in real time by three different combinations of HPICs.

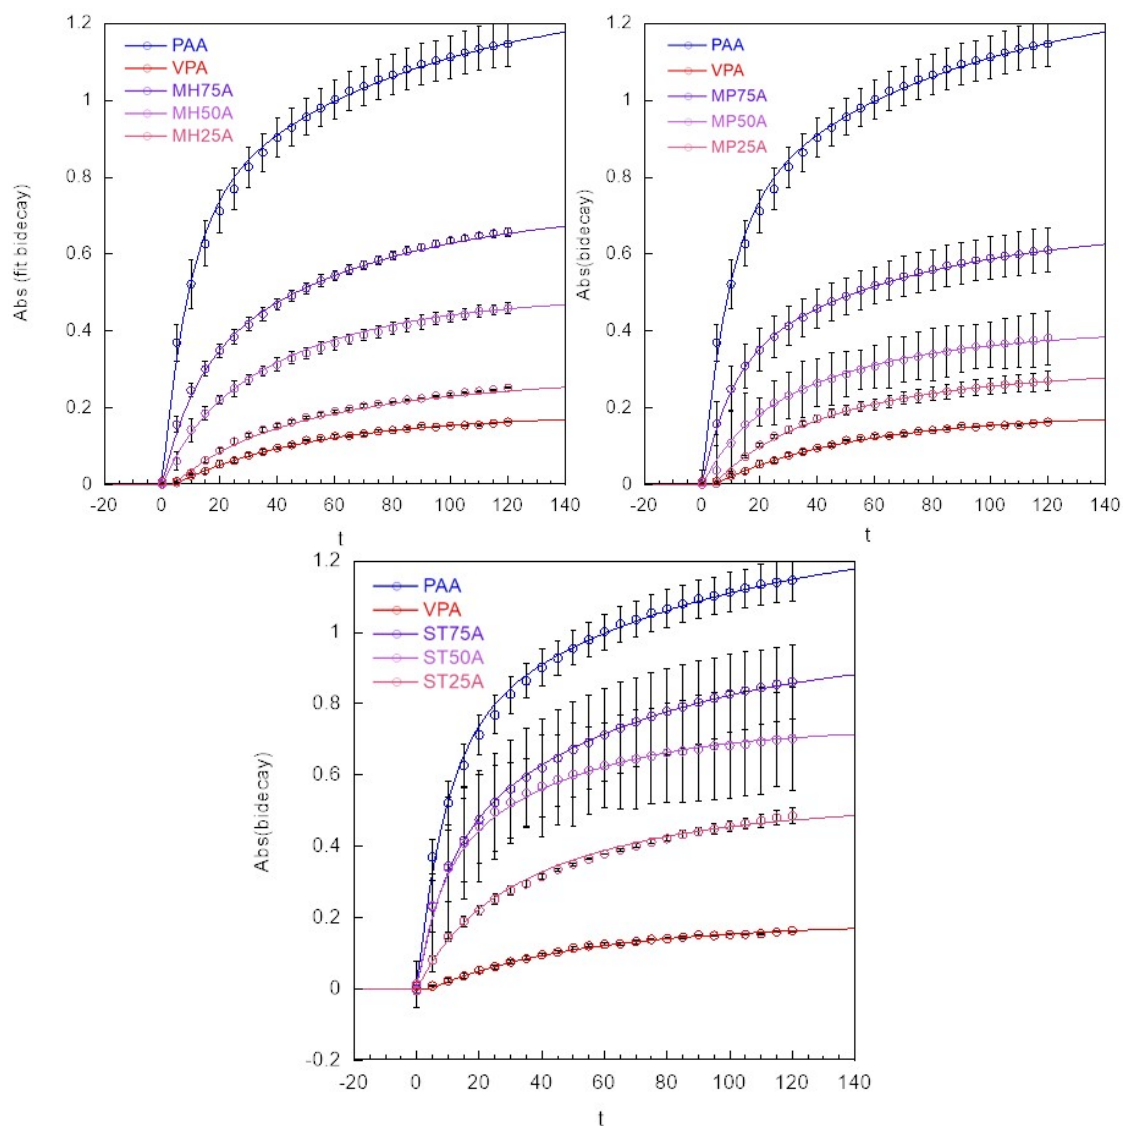

**Figure S8.** The fitting curve of the maximum absorbance of Prussian blue formed by three different combinations of HPICs (MH-HPICs, MP-HPICs and ST-HPICs).

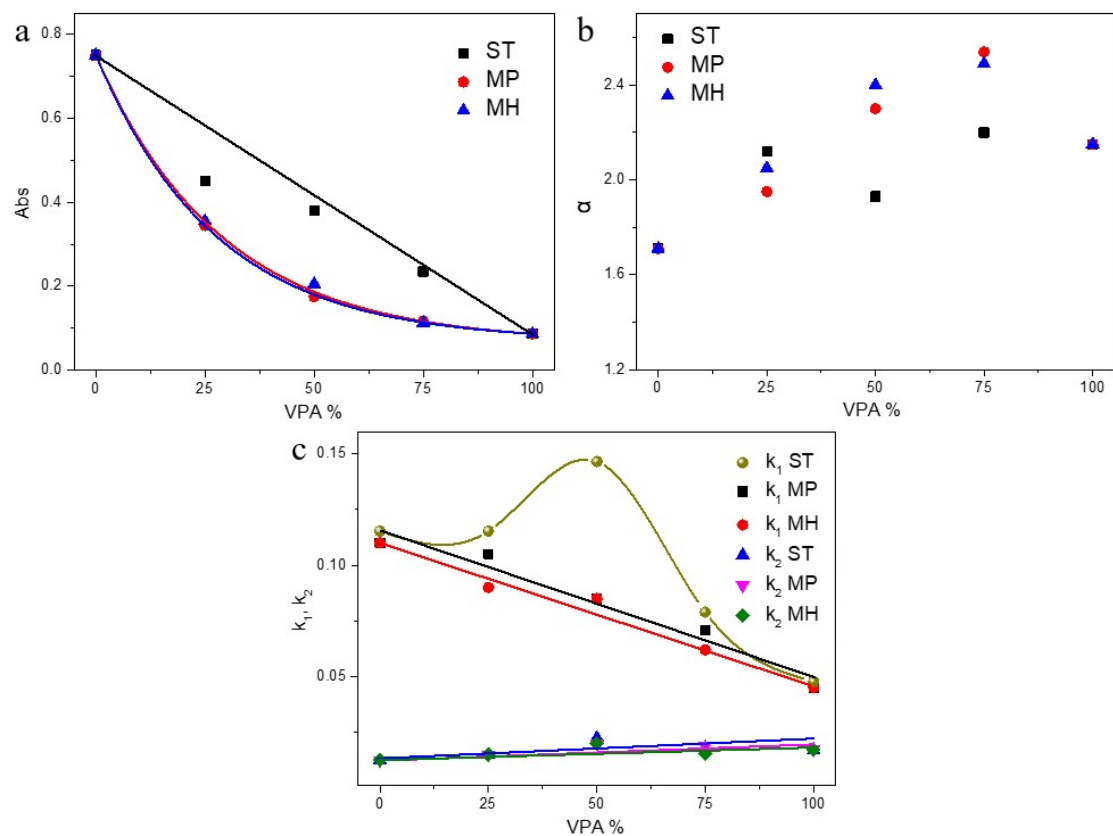

**Figure S9.** Reaction rate constants  $k_1$  and  $k_2$  versus the content of VPA in the precursor of HPICs for the three types of systems (ST-HPICs, MP-HPICs and MH-HPICs)



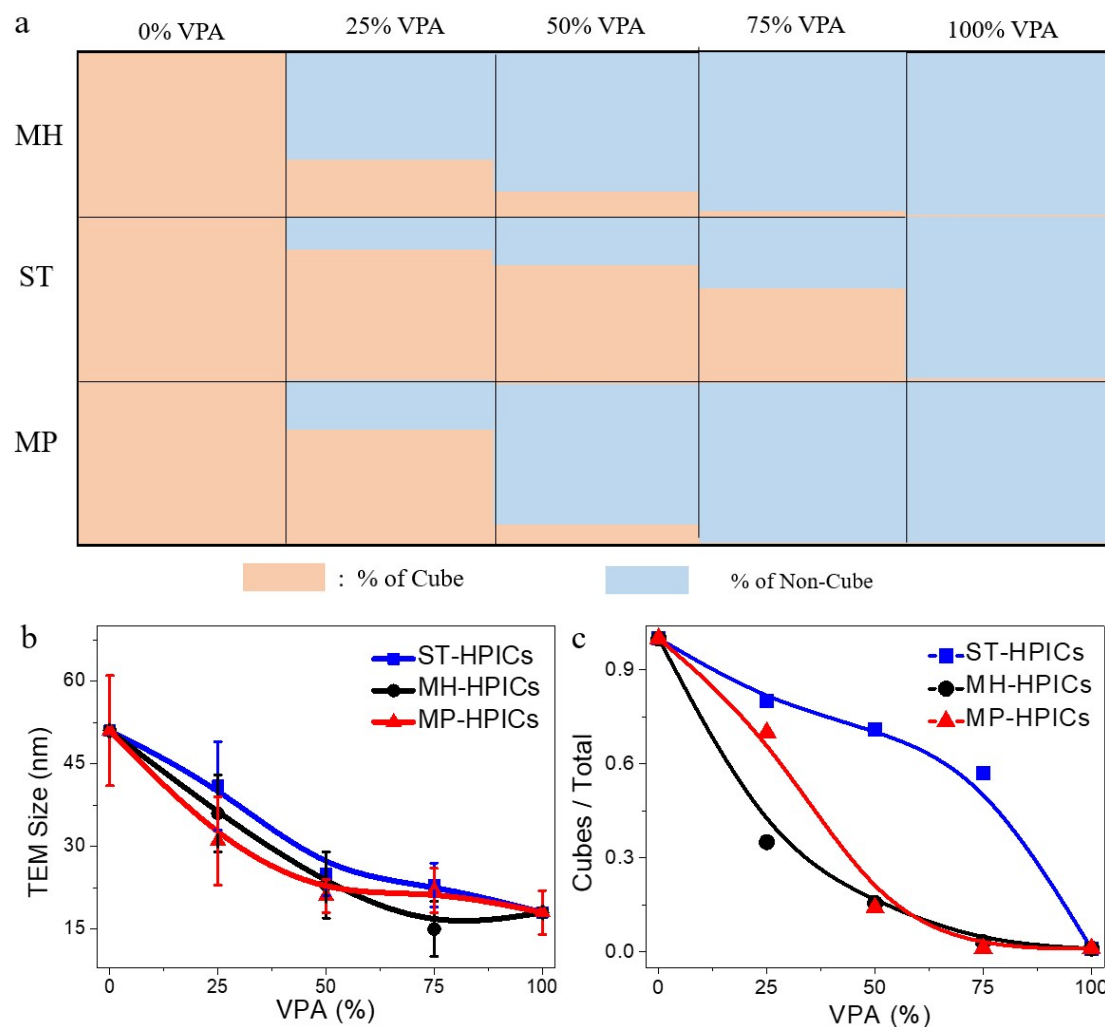

**Figure S10.** (a) Evolution of the proportion of cubic Prussian blue nanoparticles to total particles synthesized with three different HPICs (ST, MH and MP) as precursors as a function of VPA content. (b) Evolution of TEM size as a function of VPA content for Prussian blue nanoparticles synthesized with HPICs as precursors. (c) Evolution of the proportion of cubic Prussian blue nanoparticles to total particles.

a

| Var                           | PC1   | PC2   |
|-------------------------------|-------|-------|
| TEM size (nm)                 | -0,94 | 0,20  |
| Ratio cube/total (%)          | -0,92 | -0,21 |
| Abs                           | -0,98 | 0,045 |
| $k_1$                         | -0,75 | -0,56 |
| $k_2$                         | 0,51  | -0,79 |
| Alpha                         | 0,87  | 0,14  |
| Degradation ratio at pH3 /(%) | -0,95 | -0,01 |
| Degradation ratio at pH1 /(%) | -0,57 | -0,71 |
| Release Fe at pH3 (%)         | -0,90 | 0,35  |
| Release Fe at pH1 (%)         | -0,97 | 0,20  |

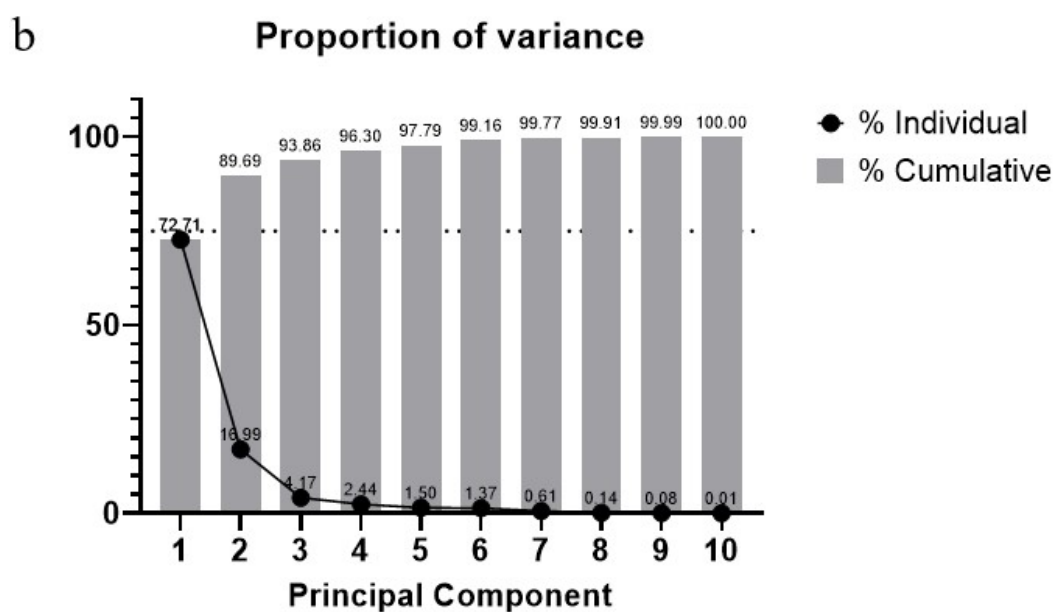

**Figure S11.** (a) Correlation between principal components PC1 and PC2 and experimental data (b) Proportion of variance (individual and cumulative) of calculated principal components.

**Table S2.** Data use for multivariate analysis.

|       | Type of system | %AA | TEM size(nm) | Standard deviation(nm) | Ratio cube/total (%) | Abs    | k <sub>1</sub> | k <sub>2</sub> | Alpha | Degradation ratio at pH3 /(%) | Standard deviation-pH3/(%) | Degradation ratio at pH1 /(%) | Standard deviation-pH1/(%) | Release Fe at pH3 (%) | Release Fe at pH1 (%) |
|-------|----------------|-----|--------------|------------------------|----------------------|--------|----------------|----------------|-------|-------------------------------|----------------------------|-------------------------------|----------------------------|-----------------------|-----------------------|
| 100/0 | ST             | 100 | 51           | 10                     | 100                  | 0.75   | 0.11           | 0.0125         | 1.71  | 84.5                          | 8.5                        | 31.5                          | 0.4                        | 26                    | 77                    |
| 75/25 | ST             | 75  | 41           | 8                      | 80                   | 0.45   | 0.11           | 0.015          | 2.12  | 63.5                          | 3.6                        | 31                            | 1.6                        | 12                    | 40                    |
| 50/50 | ST             | 50  | 25           | 4                      | 71                   | 0.38   | 0.14           | 0.0225         | 1.93  | 48                            | 7.3                        | 36.5                          | 6.9                        | 6                     | 24                    |
| 25/75 | ST             | 25  | 23           | 4                      | 57                   | 0.235  | 0.075          | 0.018          | 2.2   | 16                            | 3.2                        | 35                            | 2.4                        | 4.5                   | 11                    |
| 0/100 | ST             | 0   | 18           | 4                      | 1                    | 0.0867 | 0.045          | 0.0172         | 2.15  | 4.35                          | 0.5                        | 26.5                          | 3.7                        | 3                     | 4.5                   |
| 75/25 | MH             | 75  | 36           | 7                      | 35                   | 0.355  | 0.09           | 0.015          | 2.05  | 58                            | 2.4                        | 34                            | 4.9                        | 9.4                   | 30                    |
| 50/50 | MH             | 50  | 23           | 6                      | 15.5                 | 0.205  | 0.085          | 0.02           | 2.4   | 36                            | 2.4                        | 32.5                          | 4.7                        | 6                     | 15                    |
| 25/75 | MH             | 25  | 15           | 5                      | 3                    | 0.113  | 0.062          | 0.0156         | 2.49  | 16                            | 2.4                        | 23                            | 5.7                        | 4.2                   | 7                     |
| 75/25 | MP             | 75  | 31           | 8                      | 70                   | 0.345  | 0.105          | 0.015          | 1.95  | 69.5                          | 4.5                        | 35.5                          | 2                          | 10.6                  | 37                    |
| 50/50 | MP             | 50  | 21           | 3                      | 14                   | 0.175  | 0.085          | 0.018          | 2.3   | 27                            | 4.8                        | 29.5                          | 1.2                        | 7.3                   | 17                    |
| 25/75 | MP             | 25  | 22           | 4                      | 1                    | 0.117  | 0.071          | 0.019          | 2.54  | 18.5                          | 2                          | 26                            | 2.4                        | 5.2                   | 6.2                   |

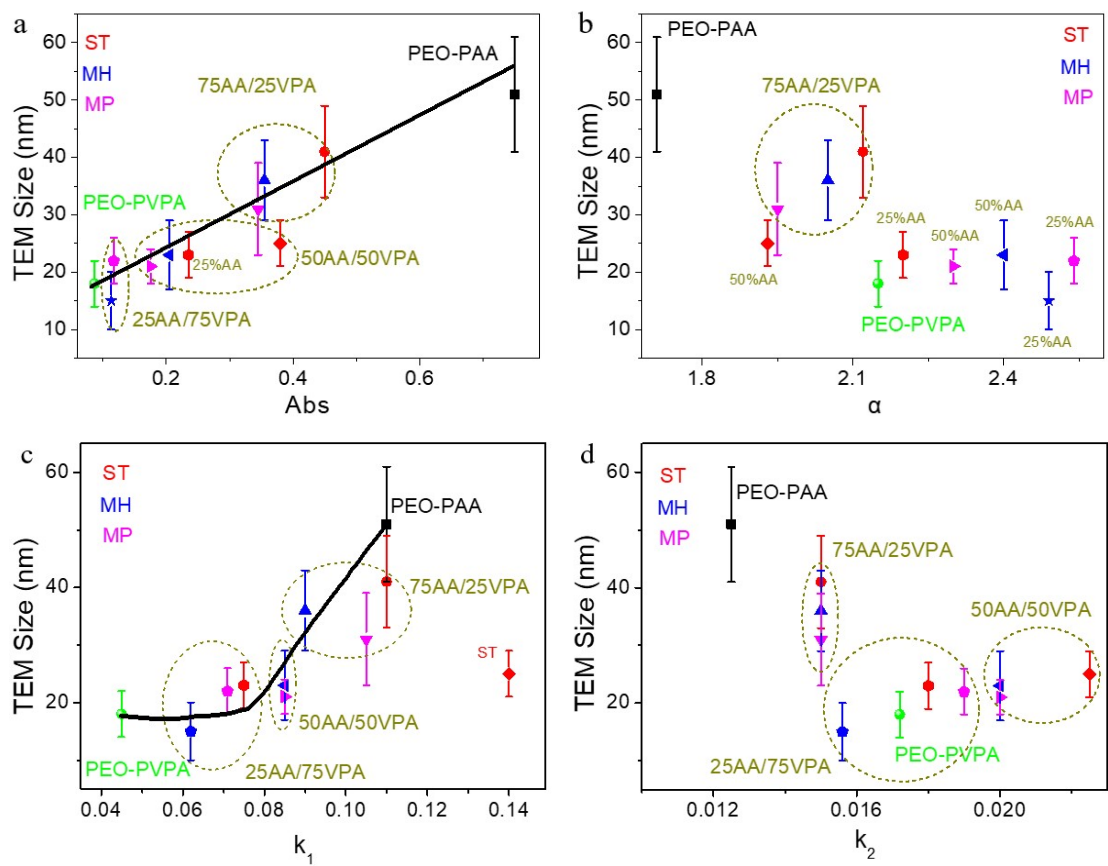

**Figure S12.** Relationship between TEM size of Prussian blue nanoparticles synthesized using three different polyions complexes (MP, MH, and ST) as precursor materials and the kinetic data during their formation: (a) max absorbance; (b)  $\alpha$ ; (c)  $k_1$  and (d)  $k_2$ .

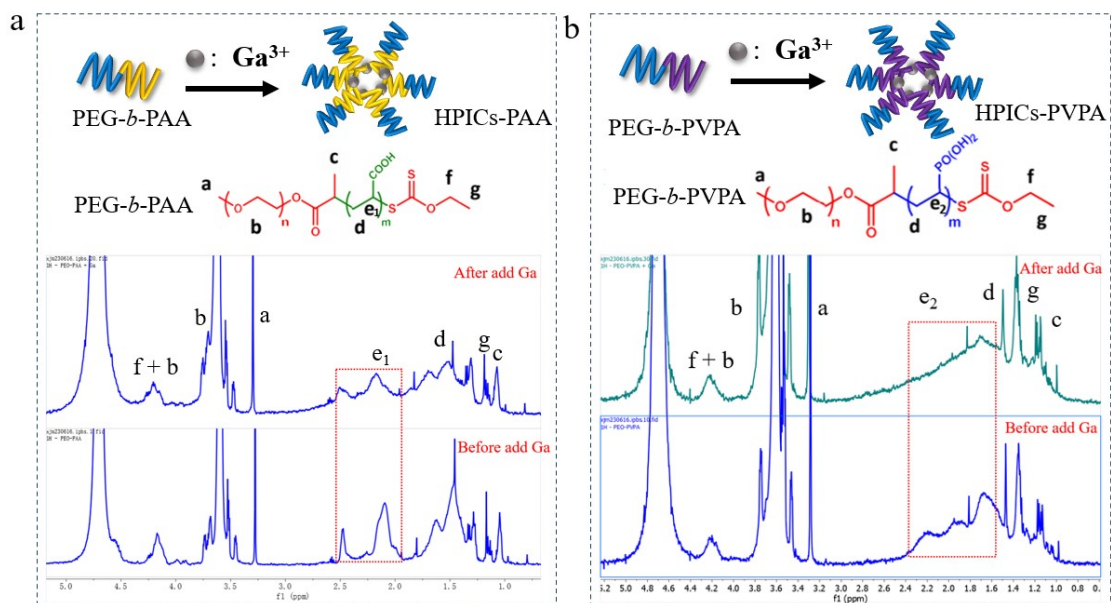

**Figure S13.** (a) <sup>1</sup>H NMR spectra of the double hydrophilic block copolymer PEG-*b*-PAA before and after binding with gallium (Ga<sup>3+</sup>) ions (including hypothetical schematic diagram). (b) <sup>1</sup>H NMR spectra of the double hydrophilic block copolymer PEG-*b*-PVPA before and after binding with gallium (Ga<sup>3+</sup>) ions (including hypothetical schematic diagram).
